# Supplementary material
Source: publisher figshare collection journal article supplement (https://acs.figshare.com/ndownloader/files/8000248)
Supplement: Supplementary file 1 [file 8000248]

# Supporting Information

## □ $\beta$ -FeOOH nanorods/carbon foam based hierarchically porous monolith for highly effective arsenic removal

*Xiao Ge,<sup>†,‡</sup> Yue Ma,<sup>†,‡</sup> Xiangyang Song,<sup>†,‡</sup> Guozhong Wang,<sup>†</sup> Haimin Zhang,<sup>†</sup>*

*Yunxia Zhang<sup>\*1,†</sup> and Huijun Zhao<sup>†,§</sup>*

<sup>†</sup> Key Laboratory of Materials Physics, Centre for Environmental and Energy  
Nanomaterials, Anhui Key Laboratory of Nanomaterials and Nanotechnology,  
CAS Center for Excellence in Nanoscience, Institute of Solid State Physics, Chinese  
Academy of Sciences, Hefei 230031, China.

<sup>‡</sup> University of Science and Technology of China, Hefei 230026, P. R. China.

<sup>§</sup> Centre for Clean Environment and Energy, Gold Coast Campus, Griffith University,  
Queensland 4222, Australia.

---

\* Correspondence Author. Email: [yxzhang@issp.ac.cn](mailto:yxzhang@issp.ac.cn)  
Fax: +86-551-65591434; Tel: +86-551-65592145

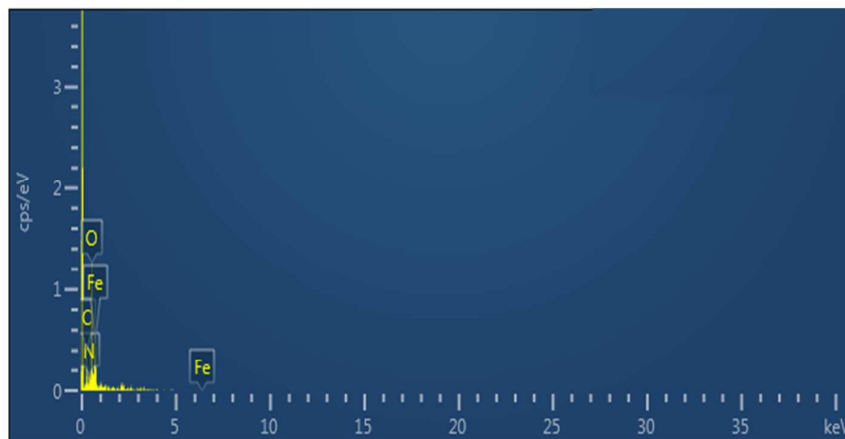

**Figure S1.** EDS spectrum of  $\beta$ -FeOOH NRs/CF.

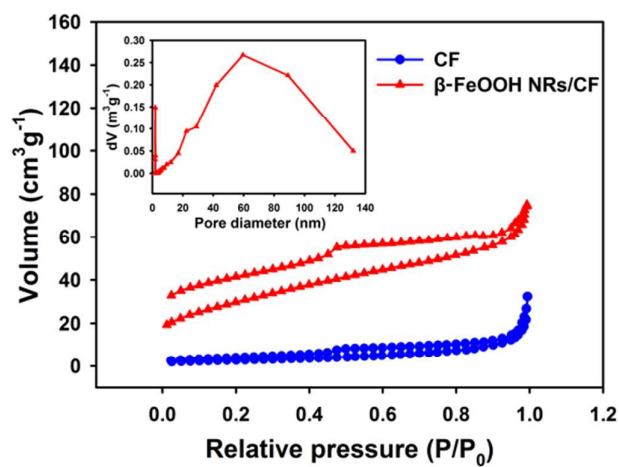

**Figure S2.**  $N_2$  adsorption/desorption isotherms of the obtained samples and the corresponding pore-size distribution.

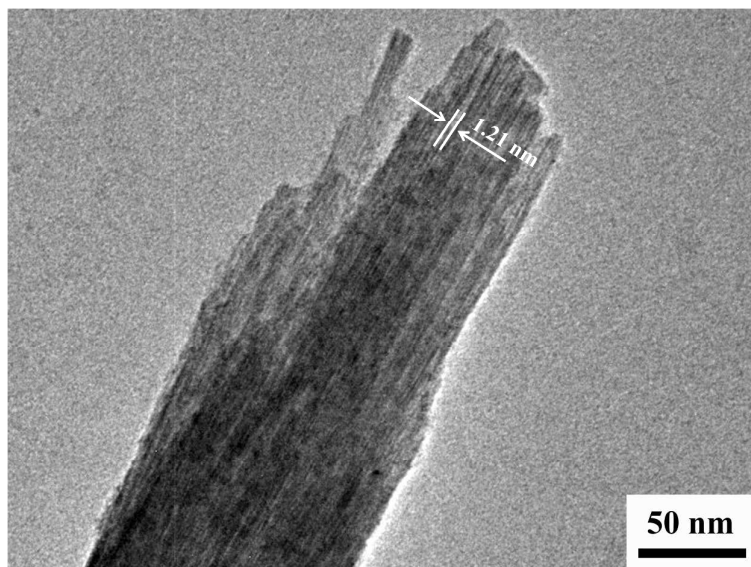

**Figure S3.** TEM image of a single  $\beta$ -FeOOH NR.
